# Supplementary material
Source: Frontiers journal article supplement (https://www.frontiersin.org/articles/436376)
Supplement: Table_1.docx [file Table_1.docx]

Supplementary Material

Mental models of socio-ecological change among small-scale fishermen in the Central Gulf of California: implications for adaptive response

**Timothy H. Frawley*1, Larry B. Crowder1, Kenny Broad2**

*** Correspondence:** Timothy H. Frawley: [tfrawley@stanford.edu](mailto:tfrawley@stanford.edu)

**Supplementary Table 1.** Summary ofdemographic information of individuals participating in the cultural consensus exercises, reported in aggregate and by user group.

|  | **All Groups**  *(N=44)* | **Generalist**  *(N=15)* | **Seasonal**  *(N=15)* | **Specialist**  *(N=14)* |
| --- | --- | --- | --- | --- |
| **Age** | 45.8  (*± S.D. 13.1)* | 46.9  (*± S.D. 13.4)* | 44.1  (*± S.D. 10.8)* | 46.6  (*± S.D. 15.2)* |
| **Residency** | 35.3  (*± S.D. 15.4)* | 27.4  (*± S.D. 12.9)* | 39.2  (*± S.D. 14.1)* | 40.0  (*± S.D. 16.1)* |
| **Experience** | 21.9  (*± S.D. 11.1)* | 27.2  (*± S.D. 11.7)* | 22.8  (*± S.D. 11.1)* | 14.5  (*± S.D. 3.73)* |
| **Education** | Primary=37.2%  Secondary=44.1%  Advanced=18.6% | Primary=33.3%  Secondary=46.6%  Advanced=20.0% | Primary=40.0%  Secondary=53.3%  Advanced=6.67% | Primary=35.7%  Secondary=28.6%  Advanced=28.6% |
| **Income Tier*** | 2.04  *(± S.D. 1.02)* | 2.13  *(± S.D. 1.20)* | 2.20  *(± S.D. 0.91)* | 1.92  *(± S.D. 0.9)* |
| **Household Members** | 3.61  *(± S.D. 1.46)* | 3.84  *(± S.D. 1.09)* | 3.67  *(± S.D. 1.12)* | 3.4  *(± S.D. 1.9)* |
| **Household Income Sources** | 0.59  *(± S.D. 0.73)* | 0.46  *(± S.D. 0.49)* | 0.73  *(± S.D. 0.68)* | 0.57  *(± S.D. 0.93)* |
| **5 Year Change in Quality of Life** | Better= 10.8%  Equal= 33.3%  Worse= 64.8% | Better= 7.1%  Equal= 14.2%  Worse= 78.5% | Better=23.1%  Equal= 38.4%  Worse= 38.4% | Better= 0.00%  Equal= 14.3%  Worse= 64.2% |
| **Organizational Affiliation**  **(Self-Id)** | Permisionario=52.2%  Cooperative=22.7%  Free= 25.0% | Permisionario=6.6%  Cooperative=46.6%  Free=46.6% | Permisionario=66.7%  Cooperative=20.0%  Free=13.3% | Permisionario=85.7%  Cooperative=0.00%  Free=14.2% |

* Monthly earnings (pesos): 1 = 0-1,644; 2= 1,645-3,288; 3= 3,289-4,932; 4= 4,933-8,200; 5=8,221+
